# Supplementary material
Source: PubMed Central journal article supplement (PMC3345519)

## **SUPPLEMENTAL FIGURES**

**Supplemental Figure S1;** *Related to Figure 1*, details of microarray experiments and additional validations.

**Supplemental Figure S2;** *Related to Figure 2*, additional RT-PCR validations, and hnRNP A2/B1 depletion in primary human fibroblasts

**Supplemental Figure S3;** *Related to Figure 3*, CLIP-seq experimental details, fraction of regulated exons with nearby CLIP data, and results of a higher separation score cutoff analysis

**Supplemental Figure S4;** *Related to Figure 4*, hnRNP binding enrichment for tissue specific AS exons and evolutionarily conserved AS exons

**Supplemental Figure S5;** *Related to Figure 5*, western blot for hnRNP proteins across all knockdowns

**Supplemental Figure S6.** *Related to Figure 6*, cancer-associated event validations with Fluidigm platform

## **SUPPLEMENTAL TABLES**

**Supplemental Table S1;** *Related to Figure 3/Supplemental Experimental Procedures*, CLIP-seq sequencing details

**Supplemental Table S2;** *Related to Figure 3*, Fraction of hnRNP events bound by each hnRNP

**Supplemental Table S3;** *Related to Figure 1,S1/Supplemental Experimental Procedures*, siRNA and ASO sequences

**Supplemental Table S4;** *Related to Figure 1,2,5,S1,S2/Supplemental Experimental Procedures*, RT-PCR and qRT-PCR primers

## **SUPPLEMENTAL EXPERIMENTAL PROCEDURES**

- **Cell culture and transfections**
- **Western blot analysis**
- **Microarray analysis for splicing changes**
- **RT-PCR and qRT-PCR validations**
- **Crosslinking immunoprecipitation followed by high-throughput sequencing (CLIP-seq)**
- **Human (hg18) gene structure annotation**
- **CLIP-seq data processing and cluster generation**
- **Motif Analysis**
- **RNA splicing maps**
- **Tissue specific exon analysis**
- **Gene ontology analysis**
- **RNA sequencing preparation (RNA-seq)**
- **RNA-seq data processing and gene expression analysis**
- **RBP and cancer target analysis**

**A**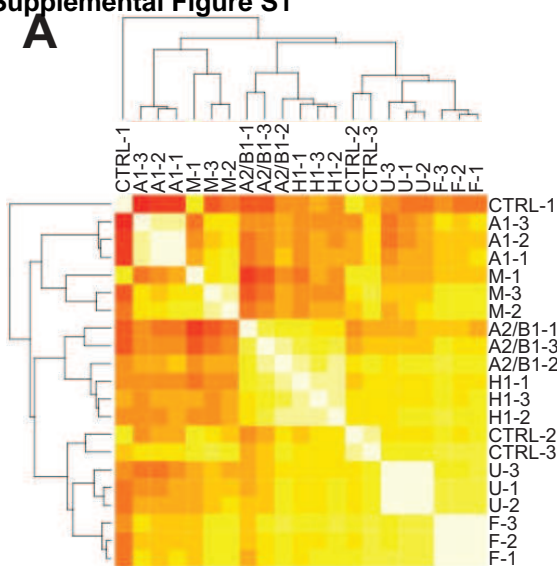**D**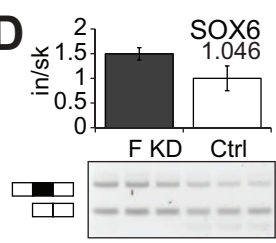**E**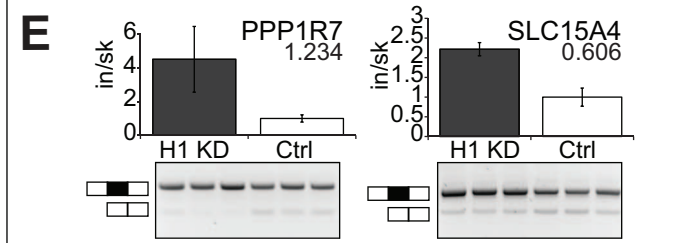**F**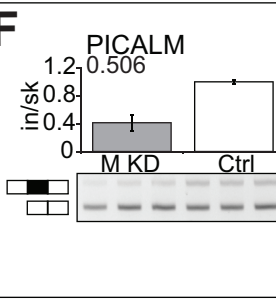**G**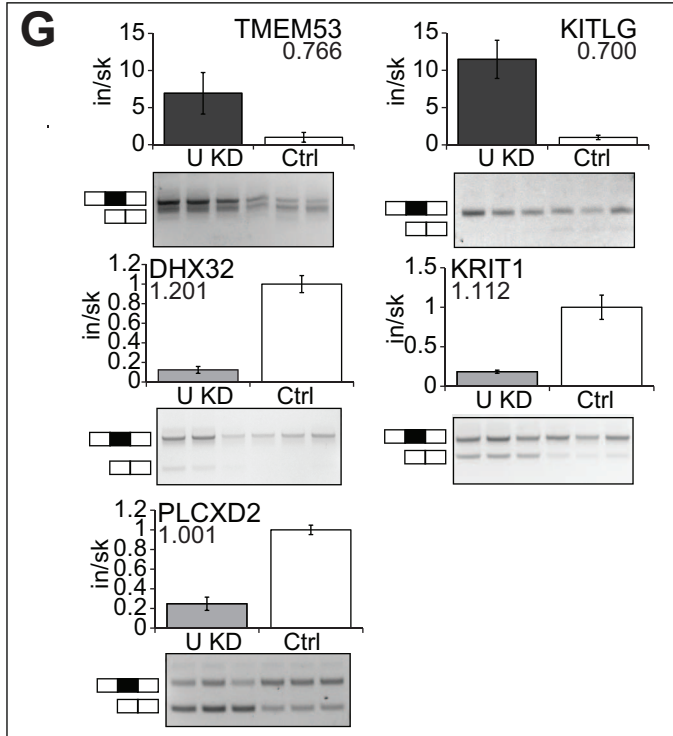**B**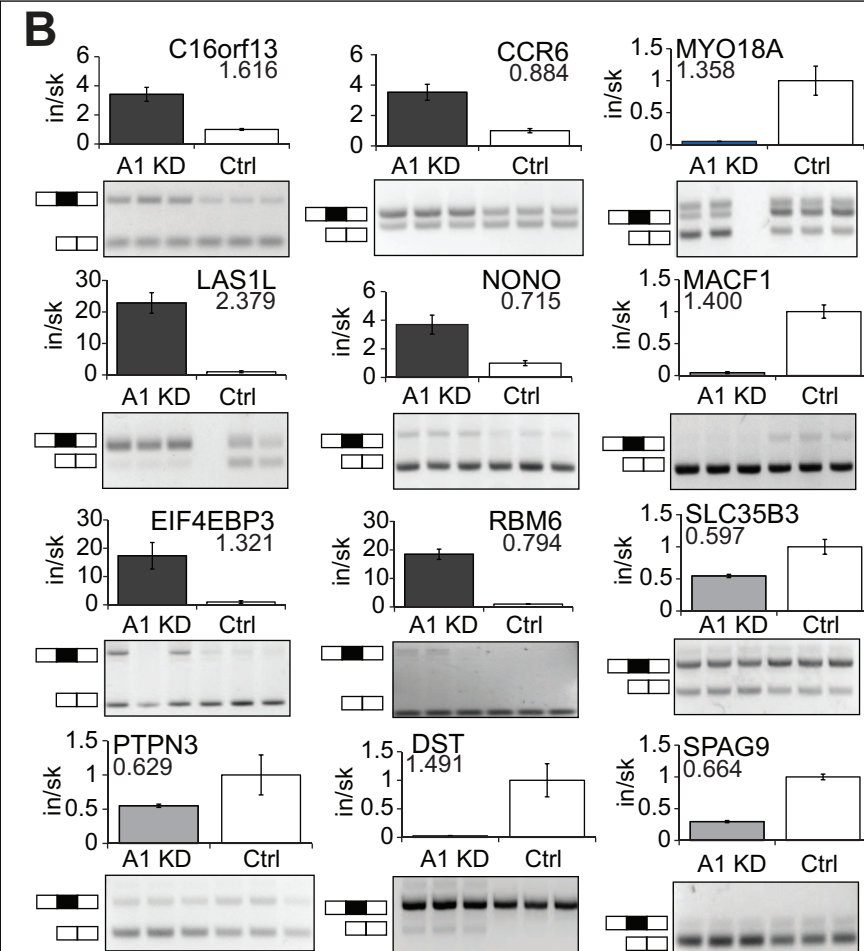**H**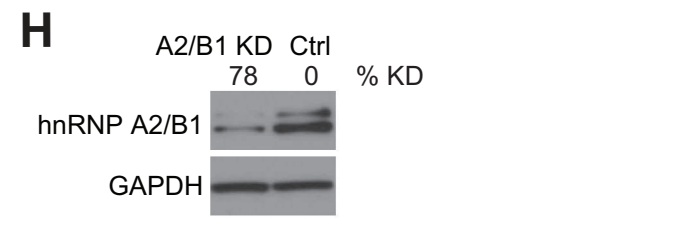**C**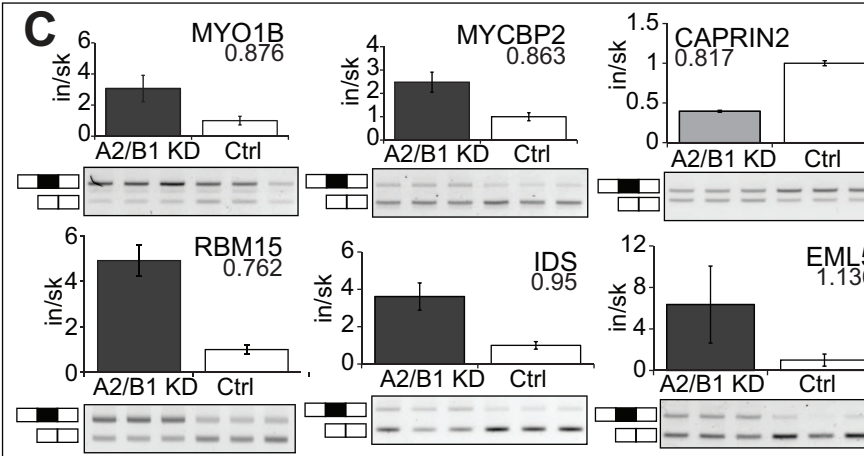**I**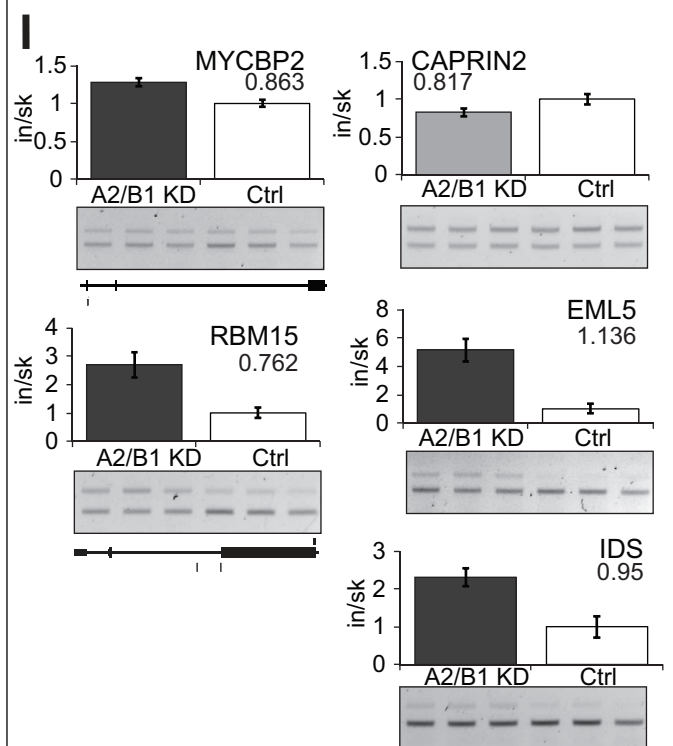

**A**

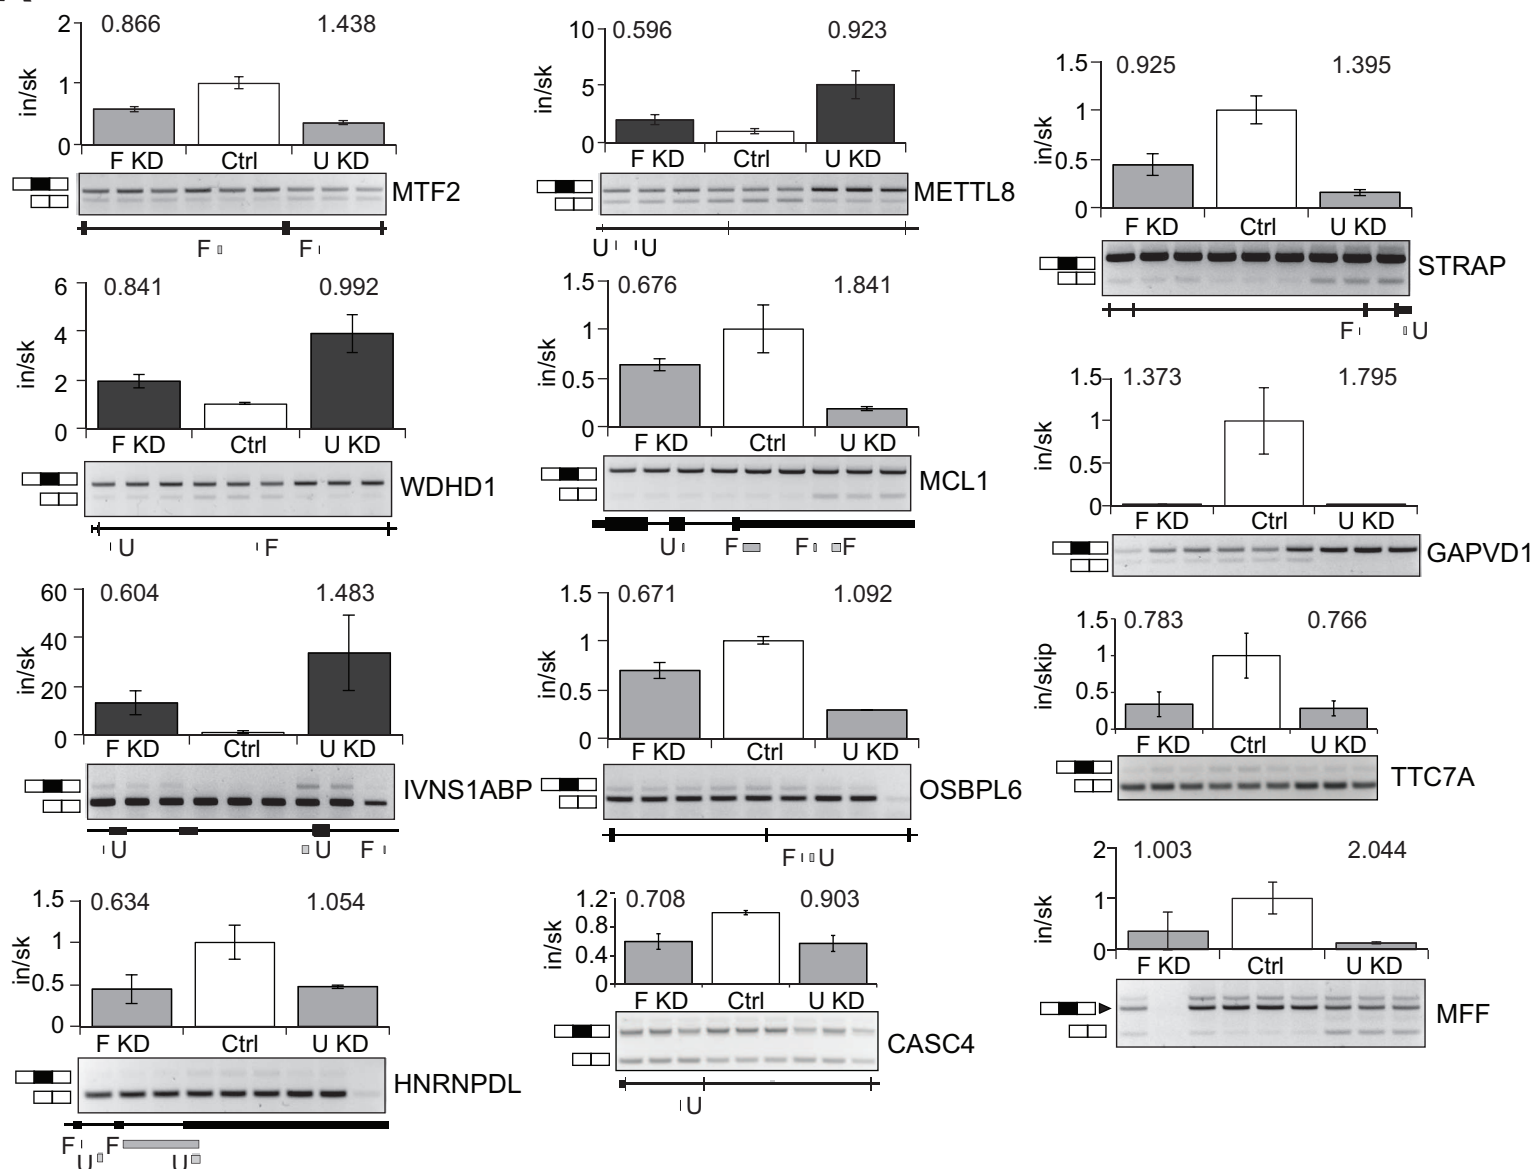

**B**

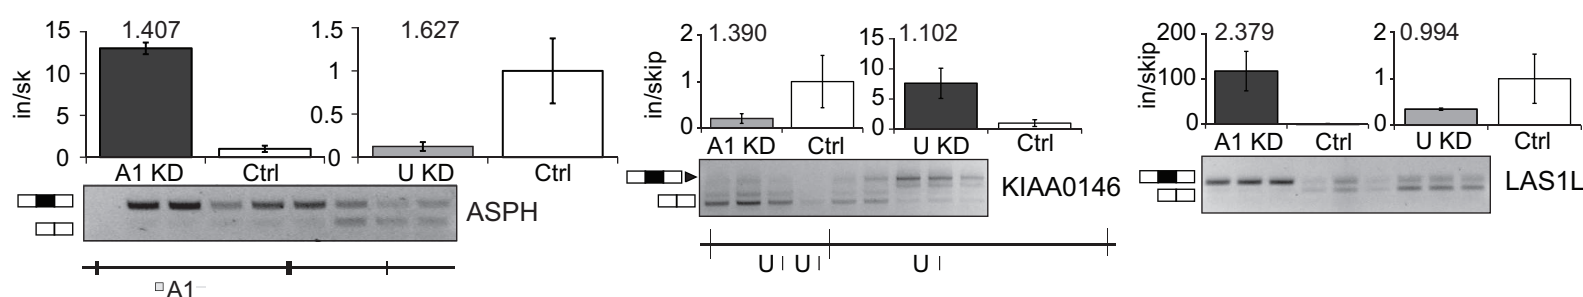

**C**

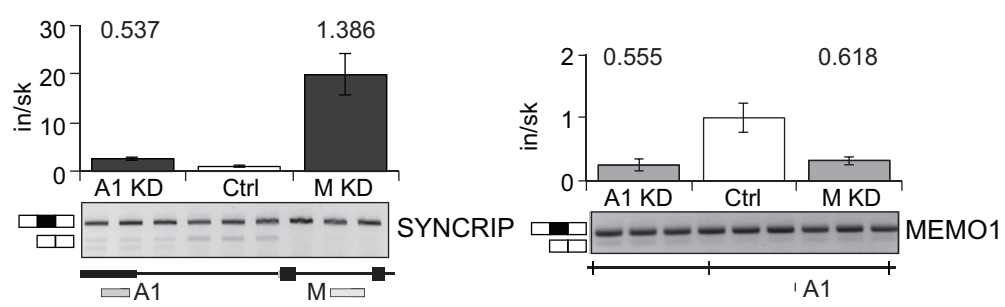

**A**

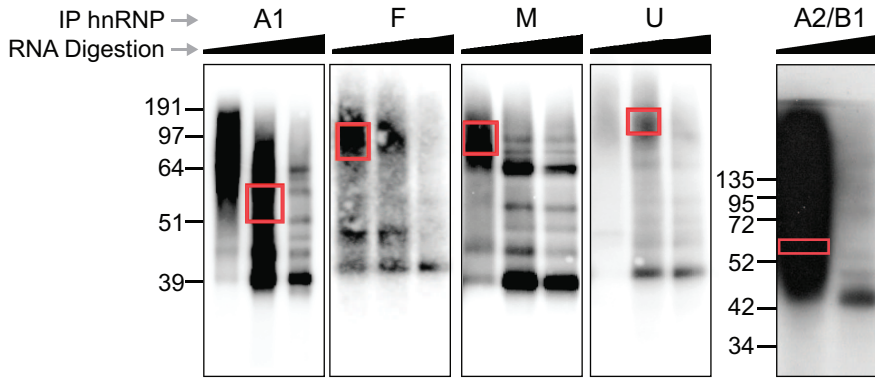

**B**

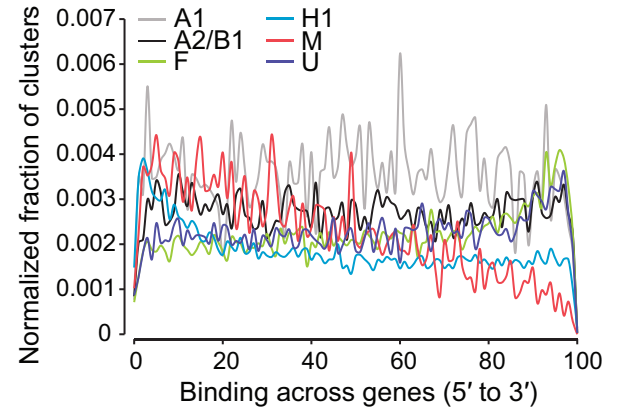

**C**

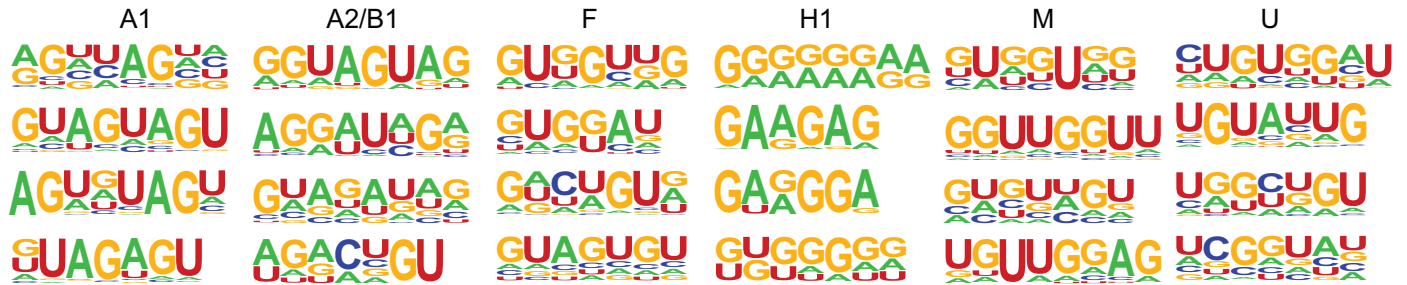

**D**

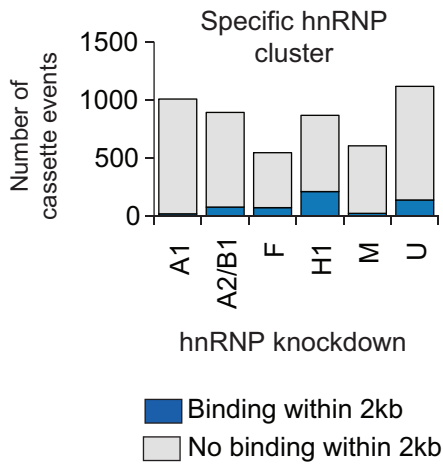

**E**

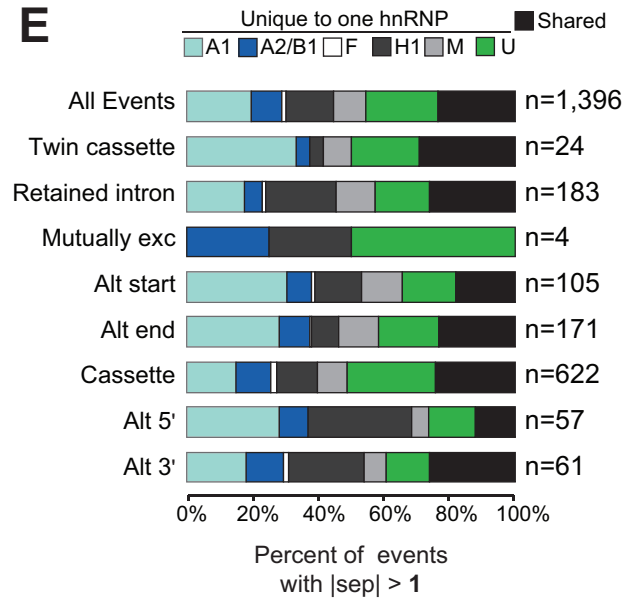

**F**

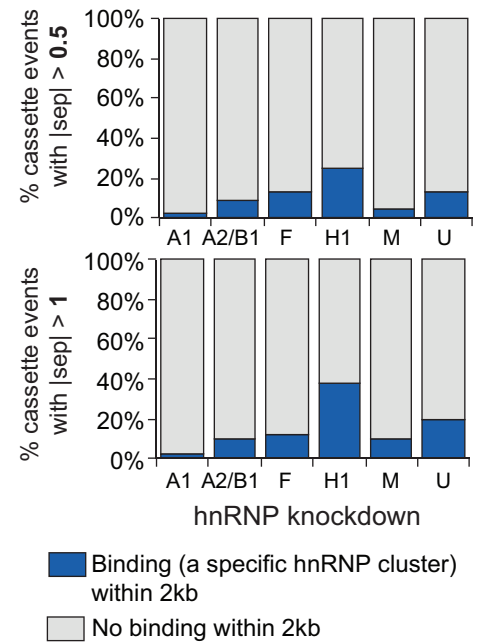

**G**

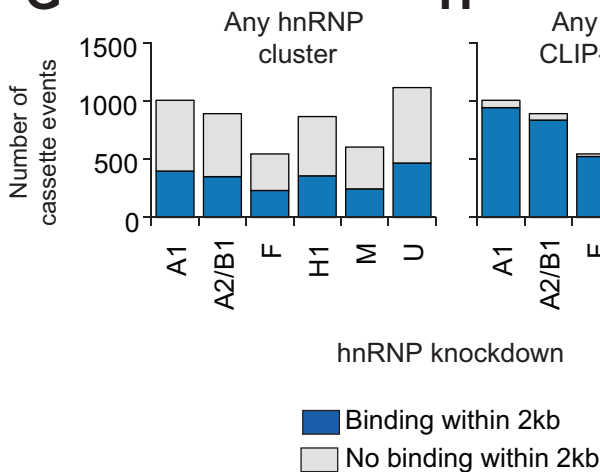

**H**

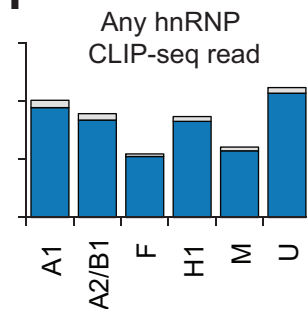

Supplemental Figure S4

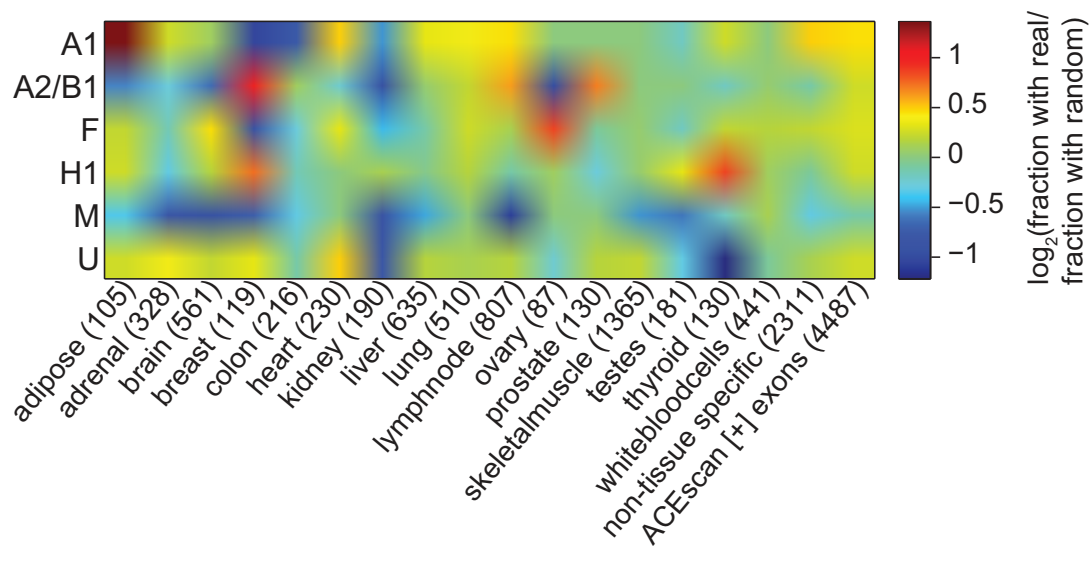



# Supplemental Figure S6

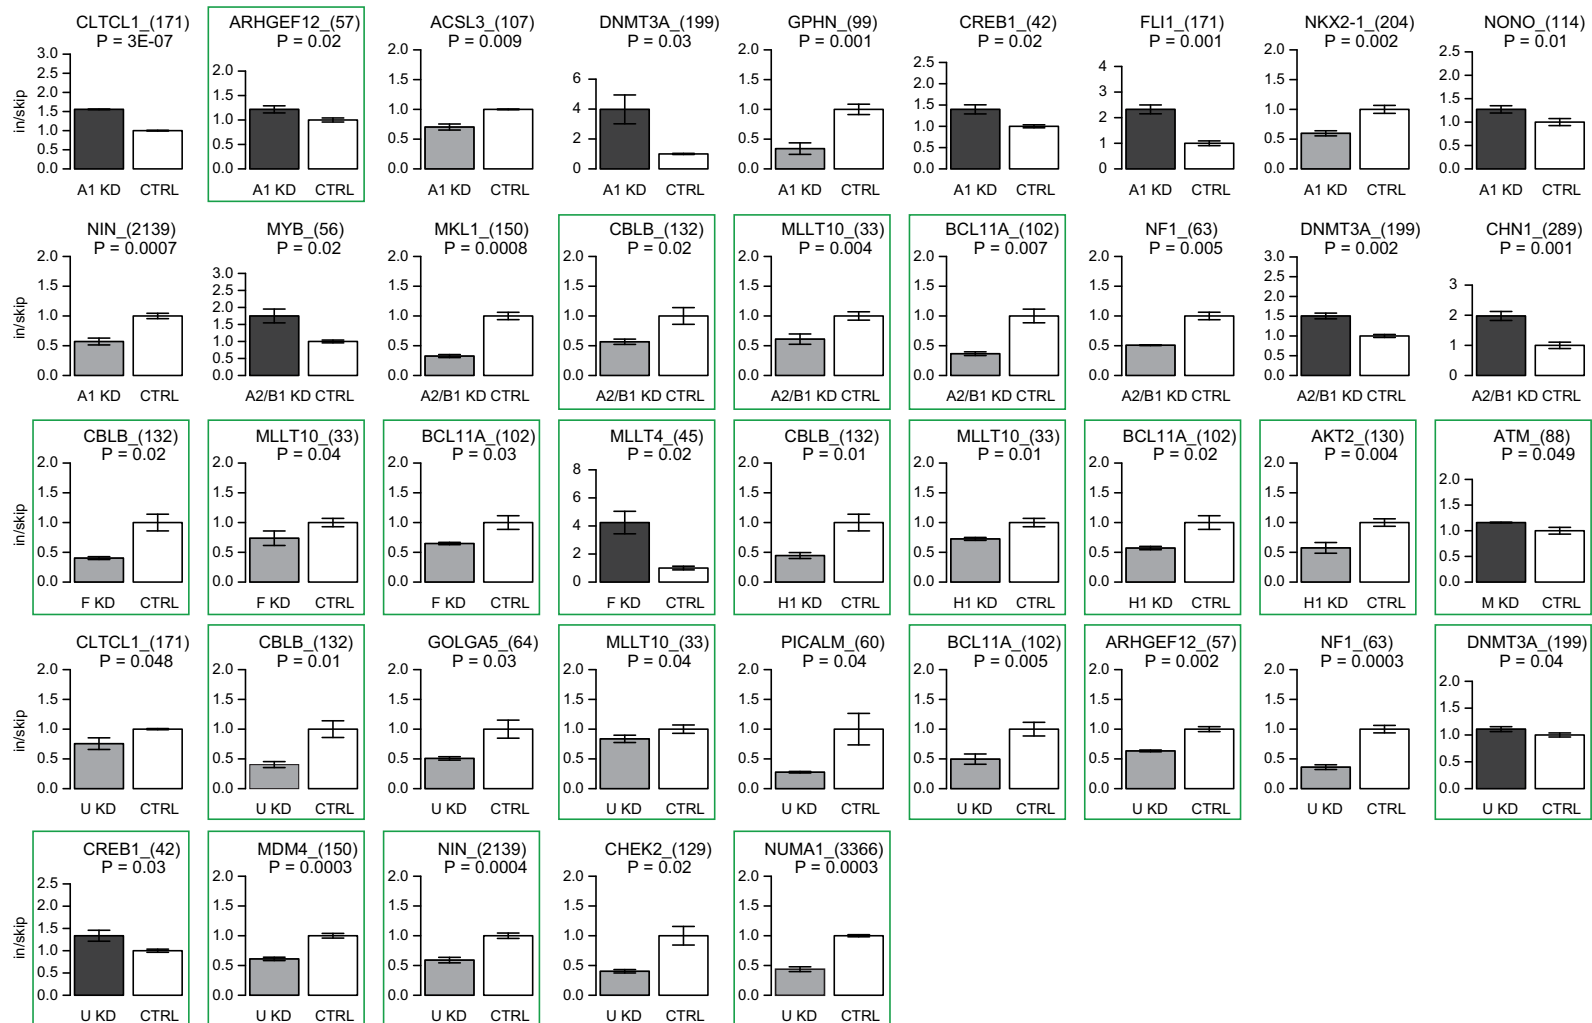

Supplement: NIHMS354945-supplement-01.pdf [file NIHMS354945-supplement-01.pdf]
